# Supplementary material
Source: HighWire-hosted journal article supplement (https://jnm.snmjournals.org/highwire/filestream/94887/field_highwire_adjunct_files/0/166165_Supplemental_Data.pdf)
Supplement: 166165_Supplemental_Data.pdf [file 166165_Supplemental_Data.pdf]

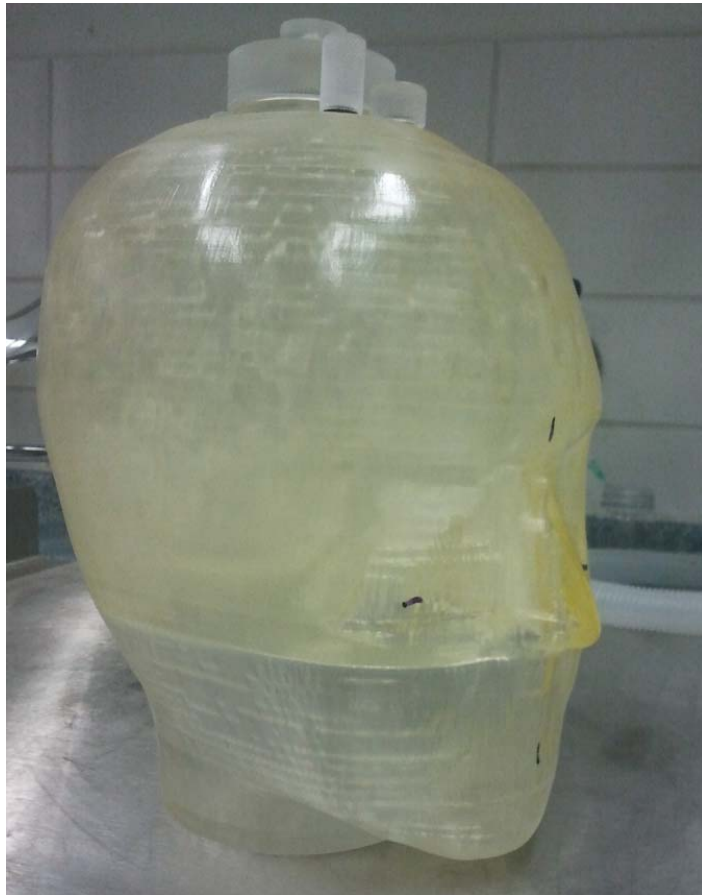

**SUPPLEMENTAL FIGURE 1.** The anatomic brain phantom used in the study.

| <b>SUPPLEMENTAL TABLE 1.</b>                                              |               |            |            |             |                  |              |
|---------------------------------------------------------------------------|---------------|------------|------------|-------------|------------------|--------------|
| <b><i>P</i> Values from the Student <i>t</i> Test Between Each System</b> |               |            |            |             |                  |              |
| <b>Scanner</b>                                                            | <b>Gemini</b> | <b>mCT</b> | <b>mMR</b> | <b>D690</b> | <b>Ingenuity</b> | <b>Signa</b> |
| <b>Gemini</b>                                                             | N/A           |            |            |             |                  |              |
| <b>mCT</b>                                                                | 0.910         | N/A        |            |             |                  |              |
| <b>mMR</b>                                                                | 0.968         | 0.945      | N/A        |             |                  |              |
| <b>D690</b>                                                               | 0.697         | 0.794      | 0.742      | N/A         |                  |              |
| <b>Ingenuity</b>                                                          | 0.763         | 0.692      | 0.748      | 0.748       | N/A              |              |
| <b>Signa</b>                                                              | 0.736         | 0.833      | 0.780      | 0.957       | 0.532            | N/A          |
